# Supplementary material for: Holotomography
Source: Springer Nature journal article supplement (doi:10.1038/s43586-024-00327-1), 2024-07-25
Supplement: 43586_2024_327_MOESM1_ESM.pdf [file 43586_2024_327_MOESM1_ESM.pdf]

Supplementary information

---

# Holotomography

---

In the format provided by  
the authors and unedited

# 1 **Supplementary information**

## 2 **Holotomography**

3 Geon Kim<sup>1,2</sup>, Herve Hugonnet<sup>1,2</sup>, Kyoohyun Kim<sup>3</sup>, Jae-Hyuk Lee<sup>4</sup>, Sung Sik Lee<sup>5,6</sup>, Jeongmin Ha<sup>7</sup>, Chunga Lee<sup>1,2</sup>,  
4 Hoewon Park<sup>8</sup>, Ki-Jun Yoon<sup>8</sup>, Yongdae Shin<sup>9</sup>, Gabor Csucs<sup>6</sup>, Ian Hitchcock<sup>10</sup>, Luke Mackinder<sup>10</sup>, Ji Hyang Kim<sup>11</sup>,  
5 Tae Hyun Hwang<sup>12</sup>, Seongsoo Lee<sup>4,13</sup>, Peter O'Toole<sup>10</sup>, Bon-Kyoung Koo<sup>7</sup>, Jochen Guck<sup>3</sup>, and YongKeun  
6 Park<sup>1,2,14,\*</sup>

7 <sup>1</sup>Department of Physics, Korea Advanced Institute of Science and Technology (KAIST), Daejeon 34141, Republic  
8 of Korea.

9 <sup>2</sup>KAIST Institute for Health Science and Technology, Daejeon 34141, Republic of Korea

10 <sup>3</sup>Max Planck Institute for the Science of light and Max-Planck-Zentrum für Physik und Medizin, Erlangen 91058,  
11 Germany

12 <sup>4</sup>Gwangju Centre, Korea Basic Science Institute, Gwangju 61751, Republic of Korea

13 <sup>5</sup>Department of Biology, Institute of Biochemistry, ETH Zurich, Zurich 8093, Switzerland

14 <sup>6</sup>Scientific Center for Optical and Electron Microscopy, ETH Zurich, Zurich, 8093, Switzerland

15 <sup>7</sup>Center for Genome Engineering, Institute for Basic Science, Daejeon 34126, Republic of Korea

16 <sup>8</sup>Department of Biological Science, KAIST, Daejeon 34141, Republic of Korea

17 <sup>9</sup>Department of Mechanical Engineering, Seoul National University, Seoul 34141, Republic of Korea.

18 <sup>10</sup>Department of Biology, University of York, Heslington, York YO10 5DD, United Kingdom

19 <sup>11</sup>Department of Obstetrics and Gynecology, Fertility Centre of CHA Bundang Medical Centre, CHA University  
20 School of Medicine, Seongnam 13496, Republic of Korea

21 <sup>12</sup>Mayo Clinic Florida, 4500 San Pablo Rd S., Jacksonville, FL 32224, Unites States

22 <sup>13</sup>Department of Systems Biotechnology, Chung-Ang University, Anseong-si, Gyeonggi-do 17546, Republic of  
23 Korea

24 <sup>14</sup>Tomocube Inc., Daejeon 34109, Republic of Korea

25 \*e-mail: [yk.park@kaist.ac.kr](mailto:yk.park@kaist.ac.kr)

26

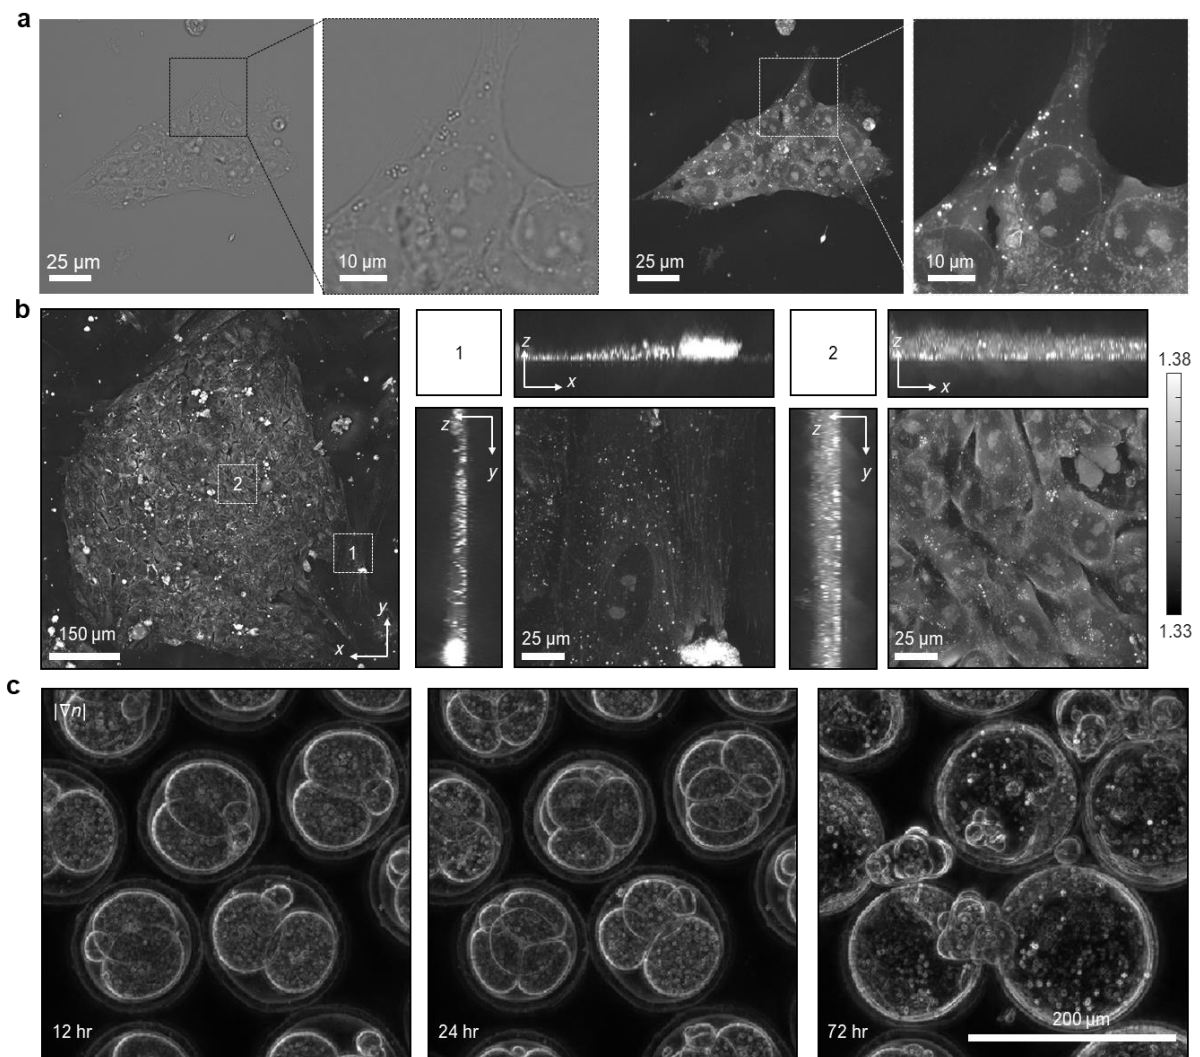

27

28

29

30

31

32

33

**Supplementary Figure 1 | Holotomography (HT) images of induced pluripotent stem cells (iPSCs) and mouse embryos. a | High-resolution iPSCs image from HT (Right) compared to bright field microscope (Left). b | Application of HT in identifying fully reprogrammed iPSC among unreprogrammed fibroblasts and partially reprogrammed iPSCs. c | Time-lapse HT images of mouse embryos displaying different developmental stages.**

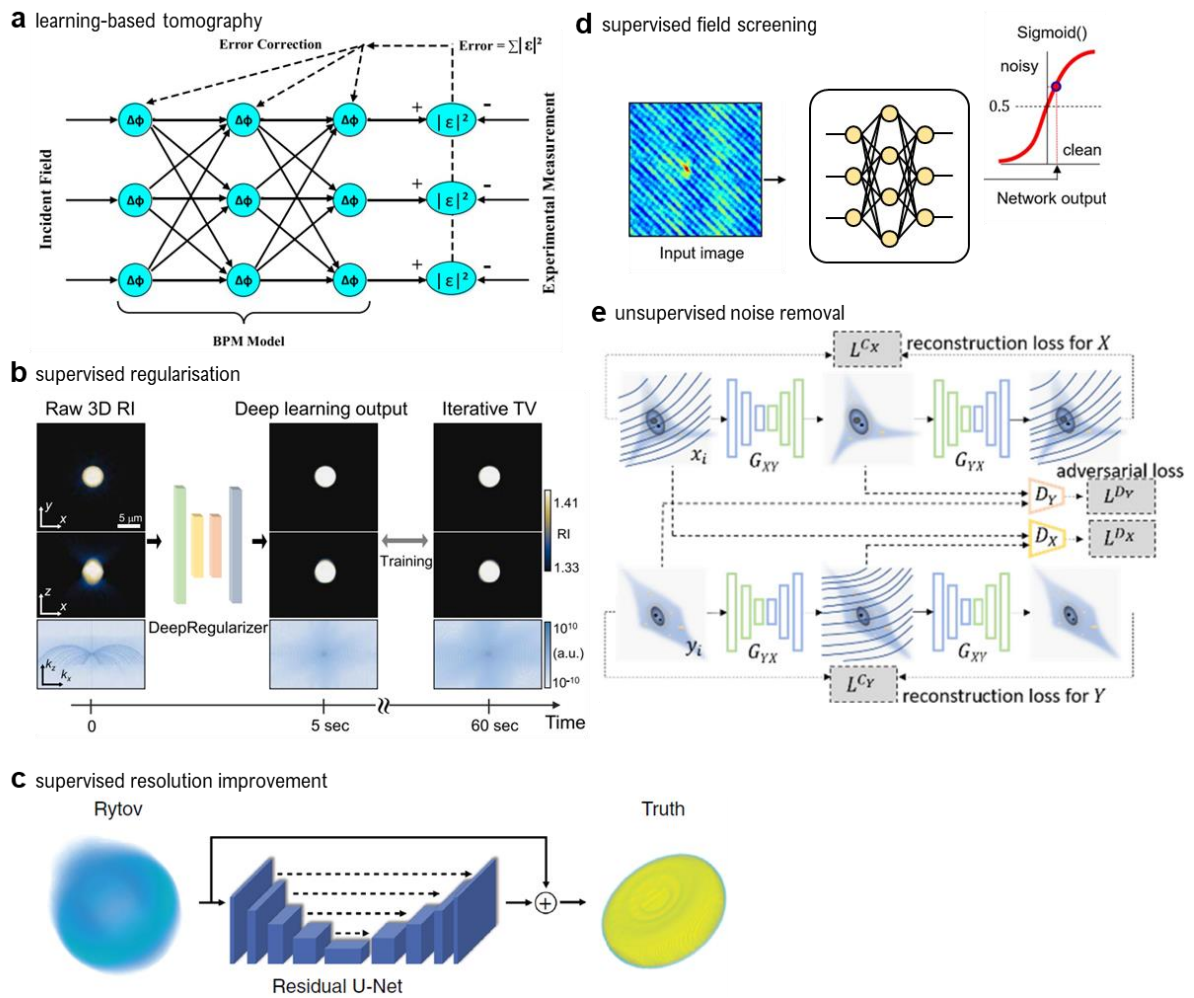

34

35 **Supplementary Figure 2 | Machine-learning-based improvements of holotomography (HT).** **a** | Learning-  
 36 based inverse scattering for optical tomography<sup>1</sup>. **b** | Deep learning approximator for fast regularisation of HT  
 37 images<sup>2</sup>. **c** | Deep learning resolution enhancement beyond weak-scattering approximation<sup>3</sup>. **d** | Learning-based  
 38 optical field selection for improved coherent HT reconstruction<sup>4</sup>. **e** | Generative model for noise removal without  
 39 paired data<sup>5</sup>. Part a reprinted with permission from ref 1, OPTICA. Part b used with permission of IEEE, from  
 40 DeepRegularizer: rapid resolution enhancement of tomographic imaging using deep learning, Ryu et al. 40.5  
 41 (2021); permission conveyed through Copyright Clearance Center, Inc. Part c used with permission of SPIE, from  
 42 Three-dimensional tomography of red blood cells using deep learning, Lim et al. Advanced Photonics 2.2, (2020);  
 43 permission conveyed through Copyright Clearance Center, Inc. Part d reprinted from ref.4, Springer Nature  
 44 Limited. Part e reprinted with permission from ref 5, OPTICA.

45

46

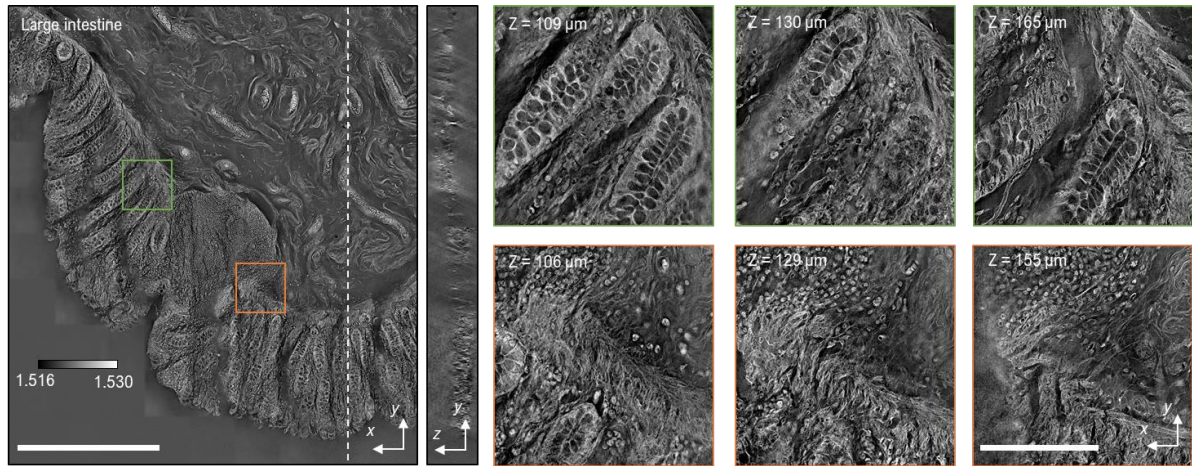

47

48

49

50

51

52

53

54

**Supplementary Figure 3 | Holotomography (HT) in investigations of 3D thick tissue.** (left) A large intestine histopathology tissue slide. (Right) the zoom images of the green and orange boxes at various axial positions<sup>6</sup>. Scale bar = 500  $\mu\text{m}$ . Used with permission of SPIE, from Multiscale label-free volumetric holographic histopathology of thick-tissue slides with subcellular resolution, Hugonnet et al., *Advanced Photonics* 3.2 (2021); permission conveyed through Copyright Clearance Center, Inc.

55 **References**

56 1 Kamilov, U. S. *et al.* Learning approach to optical tomography. *Optica* **2**, 517-522,  
57 doi:10.1364/OPTICA.2.000517 (2015).

58 2 Ryu, D. *et al.* DeepRegularizer: Rapid Resolution Enhancement of Tomographic  
59 Imaging Using Deep Learning. *IEEE Transactions on Medical Imaging* **40**, 1508-1518,  
60 doi:10.1109/TMI.2021.3058373 (2021).

61 3 Lim, J., Ayoub, A. B. & Psaltis, D. Three-dimensional tomography of red blood cells  
62 using deep learning. *Advanced Photonics* **2**, 026001-026001 (2020).

63 4 Ryu, D. *et al.* Deep learning-based optical field screening for robust optical diffraction  
64 tomography. *Scientific Reports* **9**, 15239, doi:10.1038/s41598-019-51363-x (2019).

65 5 Choi, G. *et al.* Cycle-consistent deep learning approach to coherent noise reduction in  
66 optical diffraction tomography. *Optics express* **27**, 4927-4943 (2019).

67 6 Hugonnet, H. *et al.* Multiscale label-free volumetric holographic histopathology of  
68 thick-tissue slides with subcellular resolution. *Advanced Photonics* **3**, 026004-026004  
69 (2021).

70
